# Supplementary material
Source: publisher figshare collection journal article supplement (https://tandf.figshare.com/ndownloader/files/8601043)
Supplement: Supplementary file 1 [file 8601043]

# SUPPLEMENTAL DATA

Influence of roasting on the chemopreventive potential of *in vitro* fermented almonds in LT97 colon adenoma cells

Schlörmann W.<sup>1,3\*</sup>, Fischer S.<sup>1</sup>, Saupe C.<sup>1</sup>, Dinc T.<sup>1</sup>, Lorkowski S.<sup>2,3</sup>, Glei M.<sup>1,3</sup>

<sup>1</sup> Friedrich Schiller University Jena, Institute of Nutrition, Department of Nutritional Toxicology, Dornburger Straße 24, 07743 Jena, Germany

<sup>2</sup> Friedrich Schiller University Jena, Institute of Nutrition, Department of Nutritional Biochemistry and Physiology, Dornburger Straße 25, 07743 Jena, Germany

<sup>3</sup> Competence Cluster for Nutrition and Cardiovascular Health (nutriCARD), Halle-Jena-Leipzig, Germany

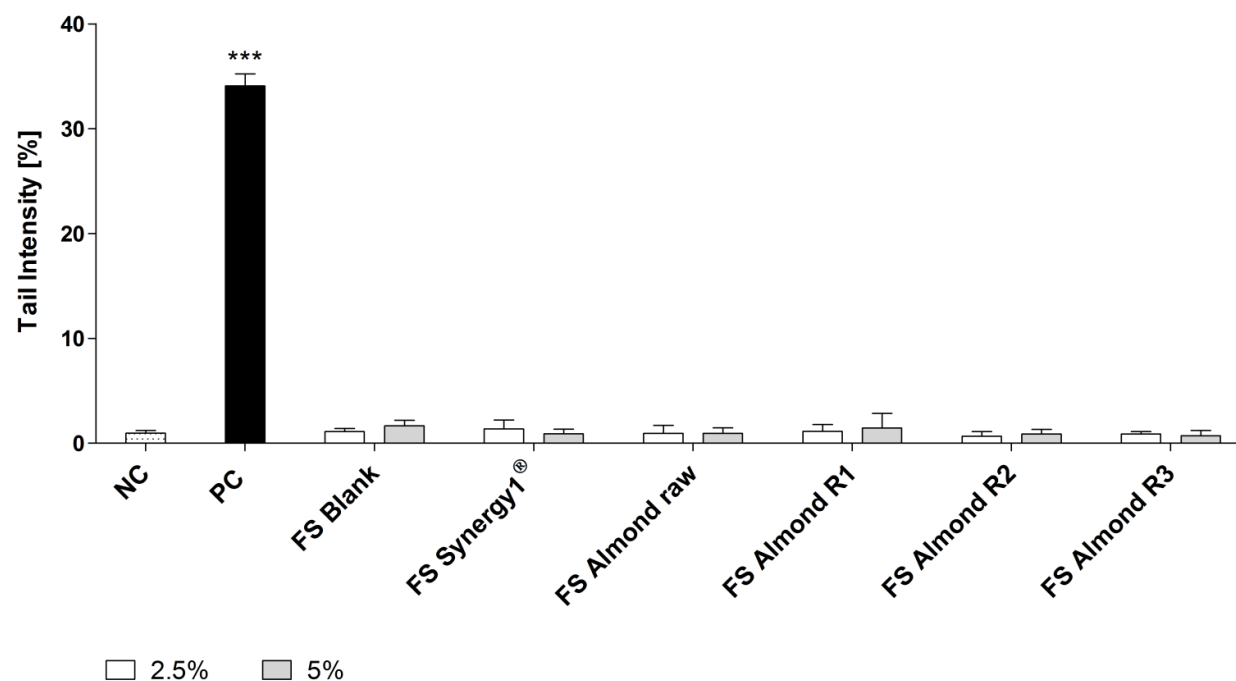

**Supplemental Figure S1** Genotoxic effects of fermentation supernatants (FS, 2.5 and 5 %) of raw and roasted almonds (R1=139.2°C/25 min, R2=161.5°C/20 min and R3=170.8°C/15 min) and controls (blank, Synergy1®) for 24 h in LT97 colon adenoma cells (mean + SD, n = 3). The significant difference between the positive control (PC, 75  $\mu$ M H<sub>2</sub>O<sub>2</sub>) and all other groups were obtained by two-way Anova/Bonferroni post-test (\*\*\* p < 0.001).

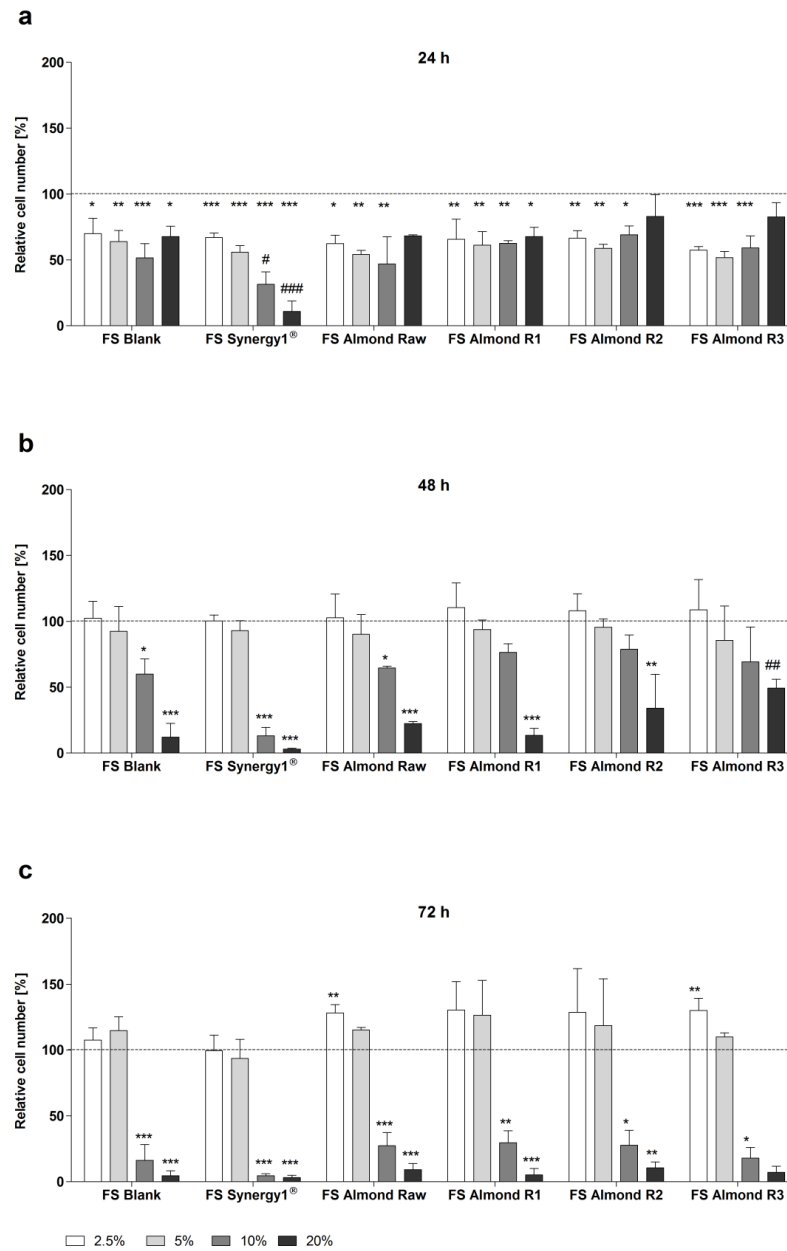

**Supplemental Figure S2** Viability of LT97 colon adenoma cells after incubation with fermented samples of raw and roasted almonds (R1=139.2°C/25 min, R2=161.5°C/20 min and R3=170.8°C/15 min) and controls (blank, Synergy1®) in concentrations of 2.5-20 % for **a)** 24 h, **b)** 48 h and **c)** 72 h (mean + SD, n = 3). Significant differences between blank and fermentation supernatants (FS) of Synergy1® or almonds (#### p < 0.001, ## p < 0.01, # p < 0.05) were obtained by two-way Anova/Bonferroni post-test. Significant differences between different FS concentrations and medium control (100%, dashed line) were obtained by one-way Anova/Bonferroni post-test (\*\*\* p < 0.001, \*\* p < 0.01, \* p < 0.05).
